# Supplementary material for: Diagnostic accuracy of point-of-care lung ultrasound for COVID-19: a systematic review and meta-analysis
Source: HighWire-hosted journal article supplement (doi:10.1136/emermed-2021-212092), 2023-03-03
Supplement: emermed-2021-212092supp001_data_supplement.pdf [file emermed-2021-212092supp001_data_supplement.pdf]

**Supplementary material 1: Search terms and search strategy**

Searches of traditional databases and registers were undertaken using the following key terms and strategy:

1. 'Lung' or 'Chest' or 'Thorax' or 'Thoracic' or 'Pulmonary'
2. 'Ultrasound' or 'Ultrasonography' or "Sonography" or 'Sonographic' or 'Ultrasonic'
3. 'COVID' or 'COVID-19' or 'Coronavirus' or 'SARS'
4. '1' and '2' and '3'
5. Remove duplicates from '4'
